# Supplementary material
Source: publisher figshare collection journal article supplement (https://karger.figshare.com/ndownloader/files/30842908)
Supplement: Supplementary file 1 [file 30842908]

**Table 3S(online suppl.):** Results for %Time/Time of Signal Quality classifiers during Recording for EC (unaveraged 5s and averaged 60s values)

| **Classifier /Time frame** | **Absolute Time**  **≤ 48hours** | | **%Time**  **≤ 48hours** | |
| --- | --- | --- | --- | --- |
| **Measurement** | EC5s | EC60s | EC5s | EC60s |
| **high**  **SigQ** | 30.3 hours  (22.5,33.8) | 36.2 hours  (29.6,41.1) | 74%  (60,80) | 87%  (75,93) |
| **intermediate**  **SigQ** | 1.0 hours  (0.7,1.4) | 2.2 hours  (1.6,3.4) | 2.7%  (1.6,4.0) | 5.3%  (3.8,9.2) |
| **Low**  **SigQ** | 0.6 hours  (0.4,1.2) | 2.6 hours  (1.4,5.8) | 1.5%  (1.0,3.6) | 6.8%  (3.4,14.2) |
| **No Data** | 8.3 hours  (7.4,12.1) | 0.0 hours  (0.0,0.0) | 22%  (18,32) | 0.0%  (0.0,0.1) |

Data is presented as Median (Interquartile Range) for proportion of time (%time)/absolute time with signal quality (SigQ) classifiers, EC Electrical Cardiometry, EC5s unaveraged data logged every 5s, EC60s averaged over 60s data logged every 60s, categorized for EC as “high” (SigQ ≥70%), “intermediate” (SigQ ≥30%) or “low” (SigQ <30%) and “no data” (no logged value for CO)
